# Supplementary material for: Sulfur-doped graphene quantum dot-based paper sensor for highly sensitive and selective detection of 4-nitrophenol in contaminated water and wastewater
Source: Royal Society of Chemistry journal article supplement (doi:10.1039/c9ra04414k), 2019-01-01
Supplement: c9ra04414k1.pdf [file c9ra04414k1.pdf]

## Electronic Supplementary Information

# Sulfur-doped graphene quantum dots based paper sensor for highly sensitive and selective detection of 4- nitrophenol in contaminated water and wastewater

Nguyen Thi Ngoc Anh<sup>a</sup>, Pei-Yi Chang<sup>b</sup> and Ruey-An Doong<sup>a,c\*</sup>

- a. Institute of Environmental Engineering, National Chiao Tung University, 1001, University Road, Hsinchu 30010, Taiwan.
- b. Center for Measurement Standard, Industrial Technology Research Institute (ITRI), 321, Sec. 2, Kuang Fu Road, Hsinchu, 30011, Taiwan.
- c. Department of Biomedical Engineering and Environmental Sciences, National Tsing Hua University, 101 Section 2, Kuang Fu Road, Hsinchu, 30013, Taiwan.

\*Corresponding author: radoong@mx.nthu.edu.tw (Ruey-an Doong)

**Table S1.** The physicochemical property of different types of wastewater

| Parameters                                               | Metal industry  | Sewage          | Electroplating  | Lake water (NTHU) |
|----------------------------------------------------------|-----------------|-----------------|-----------------|-------------------|
| pH                                                       | 7.3             | 6.7             | 7.8             | 8.5 ± 0.2         |
| Suspendid solid (mg L <sup>-1</sup> )                    | 8.6             | 5.3             | 2.3             | ND <sup>a</sup>   |
| TOC (mg L <sup>-1</sup> )                                | ND <sup>a</sup> | ND <sup>a</sup> | ND <sup>a</sup> | 22.4 ± 1.8        |
| COD (mg L <sup>-1</sup> )                                | 44.5            | 53.1            | 21.3            | ND <sup>a</sup>   |
| Metal ions (mg L <sup>-1</sup> )                         |                 |                 |                 |                   |
| Cu ions                                                  | 0.009           | 0.017           | 0.024           | ND <sup>a</sup>   |
| Zn ions                                                  | 0.041           | 0.039           | 0.009           | ND <sup>a</sup>   |
| Ni ions                                                  | 0.013           | 0.004           | 0.003           | ND <sup>a</sup>   |
| Total alkalinity (mg-CaCO <sub>3</sub> L <sup>-1</sup> ) | ND <sup>a</sup> | ND <sup>a</sup> | ND <sup>a</sup> | 130 ± 14          |

a ND: Not detected.

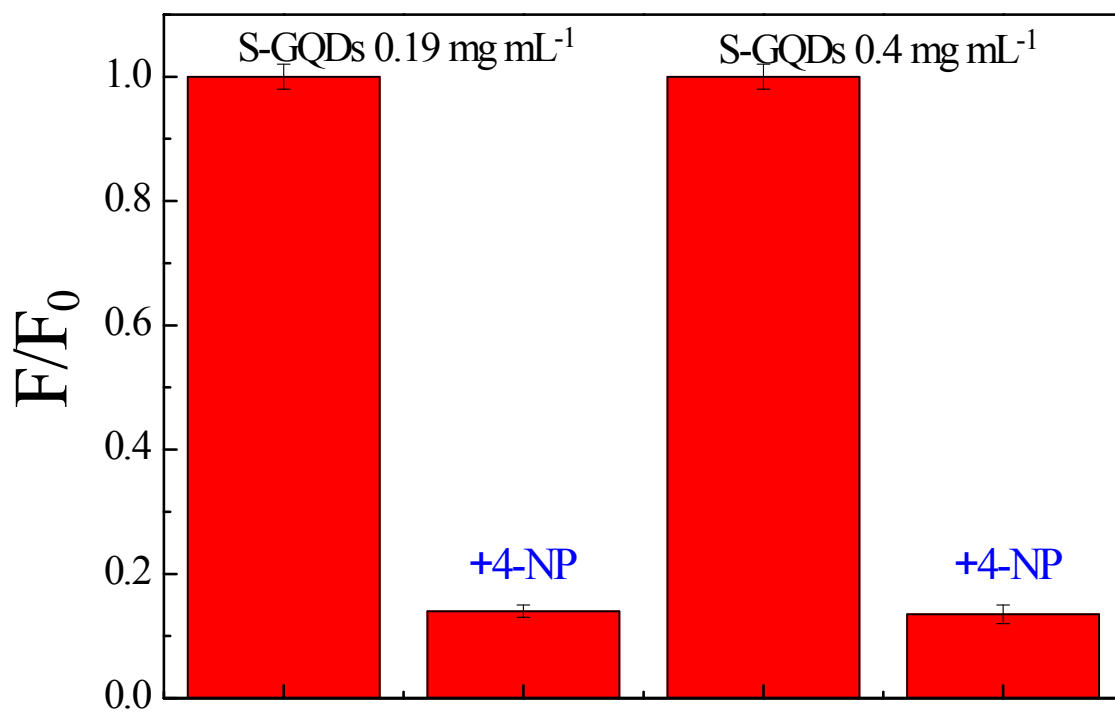

**Fig. S1.** The change in emission fluorescence of various concentrations of S-GQDs (0.19 and 0.4 mg mL<sup>-1</sup>) after addition of 200  $\mu$ M 4NP.

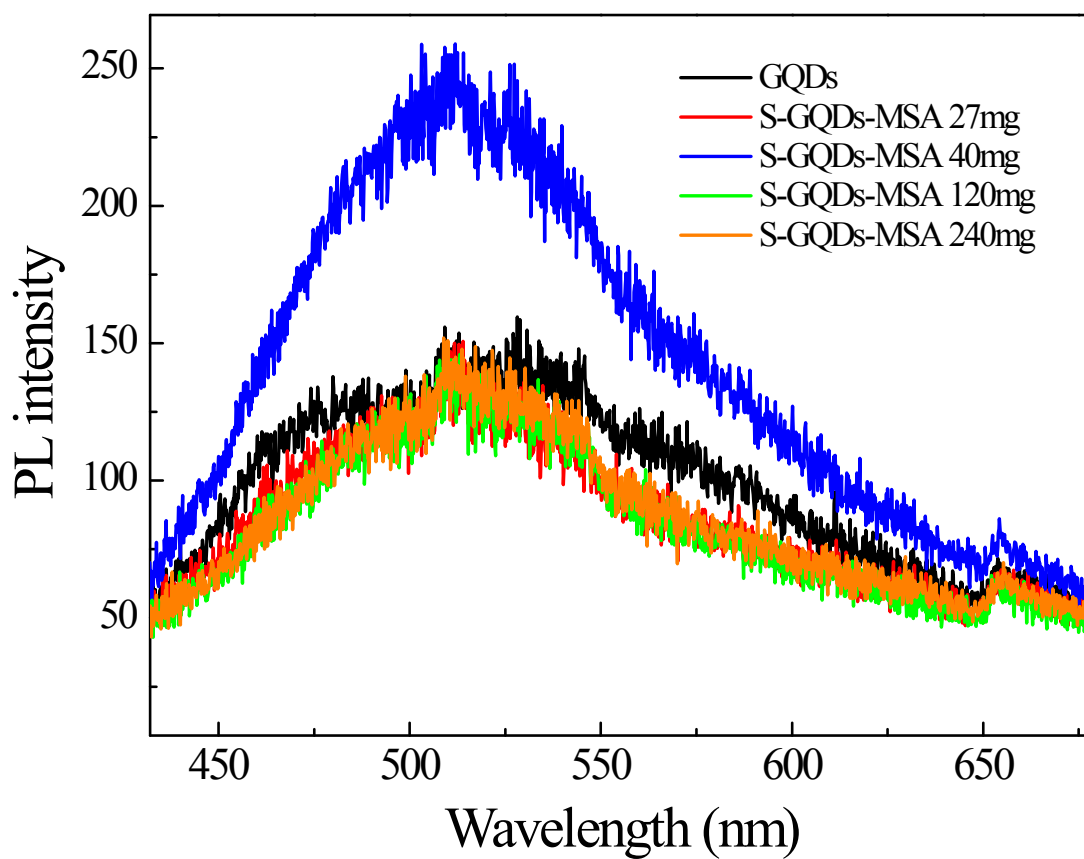

**Fig S2.** The photoluminescence intensity of as-prepared S-GQDs at various MSA/CA ratios ranging from 0.0135 to 0.12. The citric acid was fixed at 2 g, while the added amounts of MSA were in the range of 27 – 240 mg.

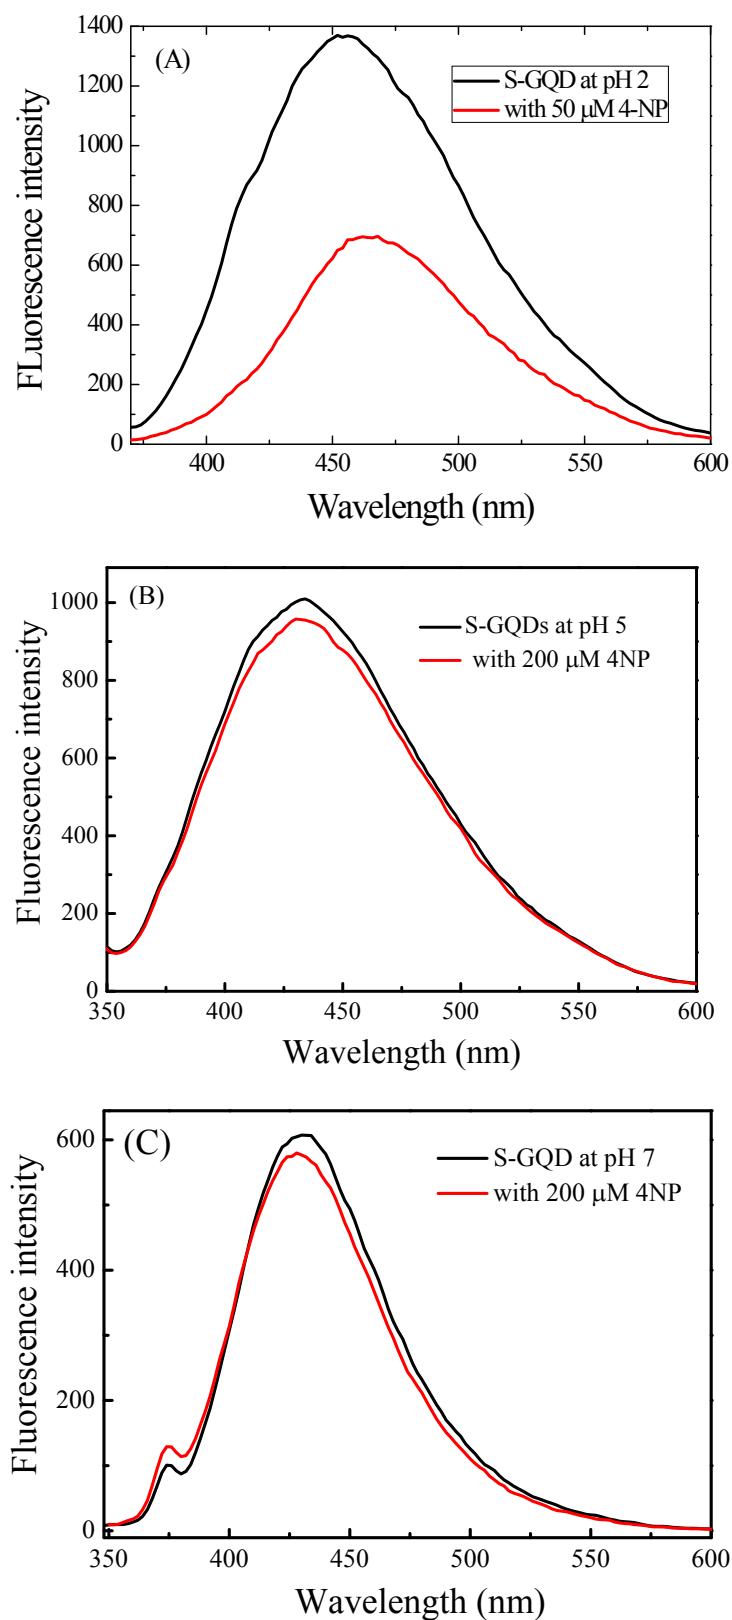

**Fig. S3.** The change in fluorescence intensity of S-GQDs before and after the addition of 4-nitrophenol at various pHs of 2 – 7 during fabrication procedure.

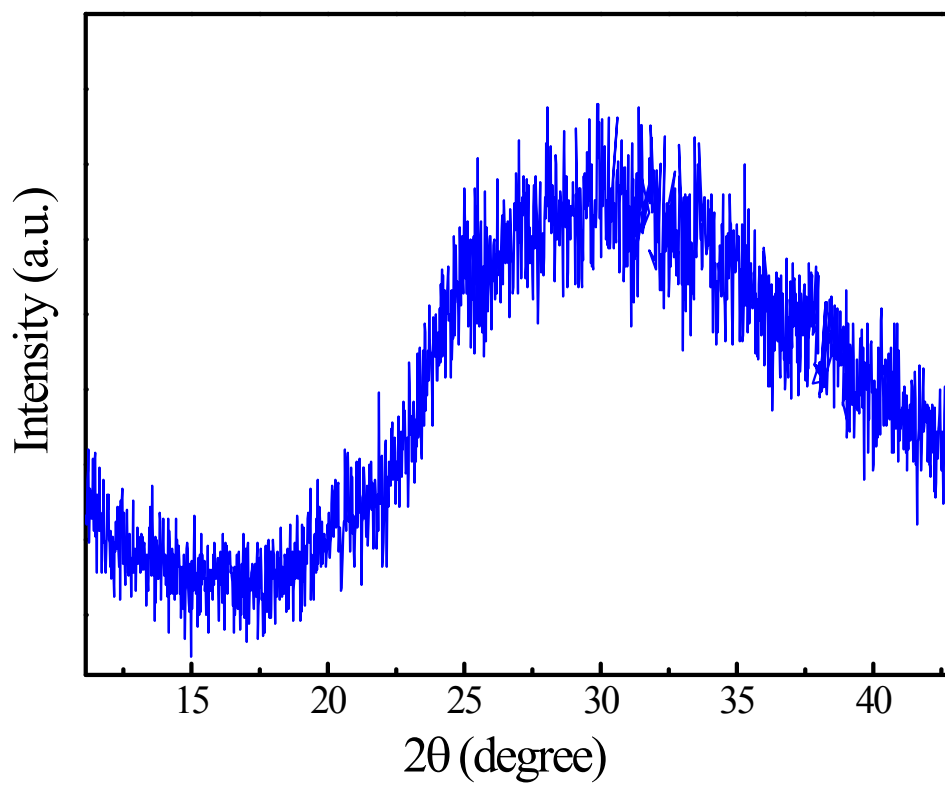

**Fig. S4.** XRD patterns of as-prepared S-GQDs.

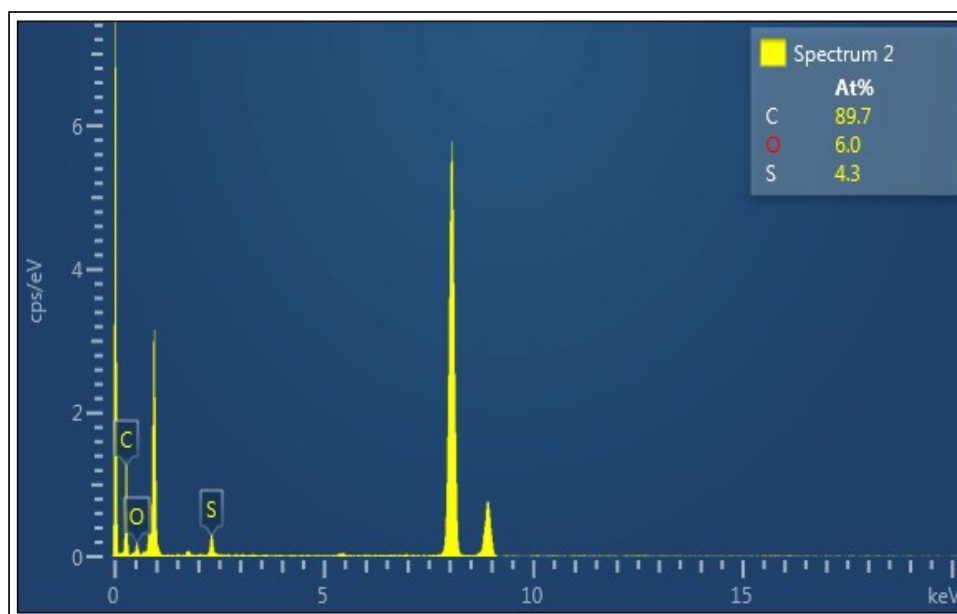

**Fig. S5.** The EDS spectrum of as-prepared S-GQDs.

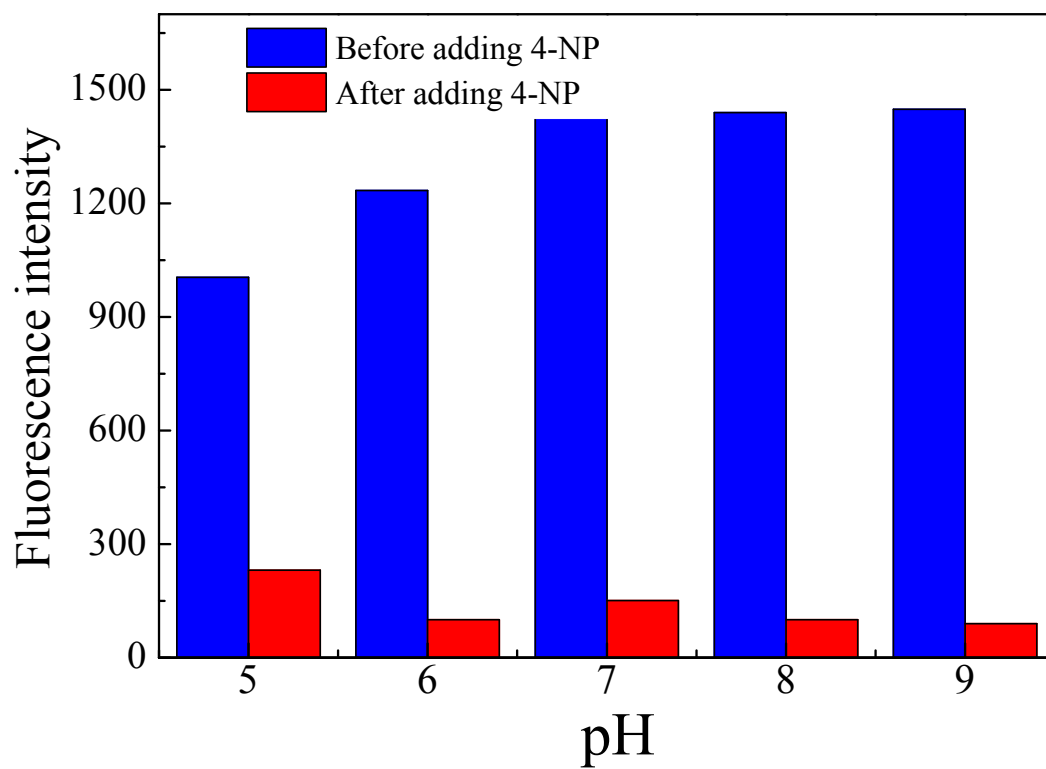

**Fig. S6.** The fluorescence intensity of S-GQDs at different pHs before and after the addition of 200  $\mu$ M 4-NP.



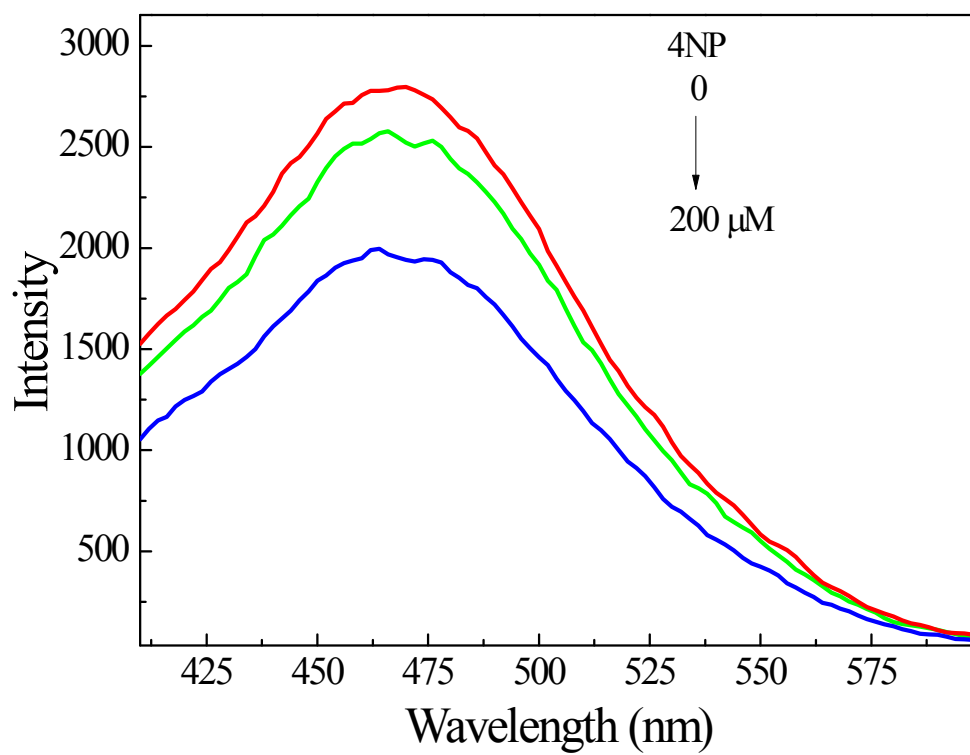

**Fig. S7.** The fluorescence emission intensity of as-prepared GQDs after the addition of various concentrations of 4-NP.

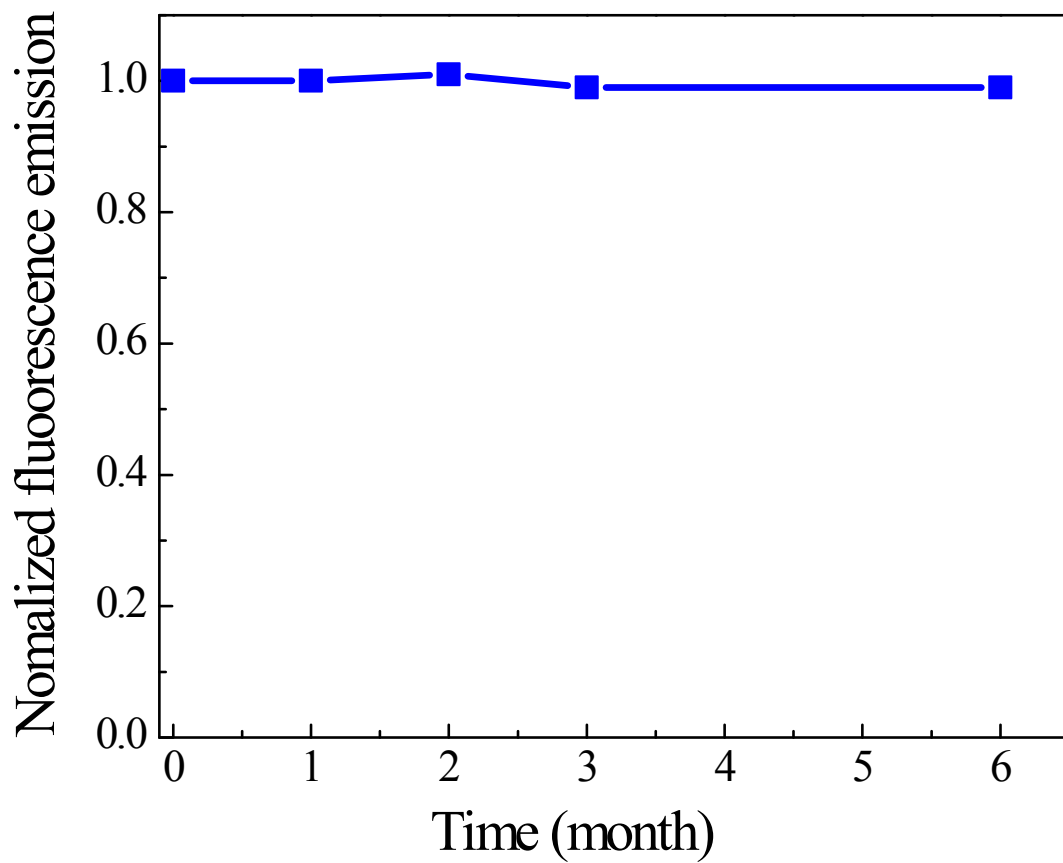

**Fig. S8.** The change in fluorescence intensity of S-GQDs after long term storage in air.
